# Supplementary material for: Anti-microRNA-21 Therapy on Top of ACE Inhibition Delays Renal Failure in Alport Syndrome Mouse Models
Source: MDPI journal article supplement (doi:10.3390/cells11040594), 2022-02-09
Supplement: s1 [file s1]

Supplementary Materials:

Table S1: Survival in 129/SvJ *Col4a3*<sup>-/-</sup> mice in weeks

| Group            | No of animals | Mean | ± | SEM | P     |
|------------------|---------------|------|---|-----|-------|
| Veh              | 8             | 10.0 | ± | 0.4 |       |
| Anti-miR-21      | 8             | 11.4 | ± | 0.5 |       |
| ACEi             | 8             | 15.3 | ± | 1.4 | * #   |
| ACEi+Anti-miR-21 | 8             | 21.6 | ± | 2.0 | * # § |

\* P<0.05 vs. Veh, # P<0.05 vs. Anti-miR-21, § P<0.05 vs. ACEi

Table S2: Relative Proteinuria (fold vs. Veh) in 129/SvJ *Col4a3*<sup>-/-</sup> mice

| High molecular weight proteinuria |                        |               |      |   |      |   | Albuminuria   |      |   |      |   |
|-----------------------------------|------------------------|---------------|------|---|------|---|---------------|------|---|------|---|
| Group                             | Age of animals (weeks) | No of animals | Mean | ± | SEM  | P | No of animals | Mean | ± | SEM  | P |
| WT                                | 9.5                    | 7             | 0.04 | ± | 0.02 |   | 7             | 0.02 | ± | 0.02 |   |
| Veh                               | 4.5                    | 3             | 0.37 | ± | 0.17 |   | 4             | 0.97 | ± | 0.22 |   |
| Veh                               | 6.0                    | 4             | 1.32 | ± | 0.50 |   | 4             | 1.24 | ± | 0.28 |   |
| Veh                               | 7.5                    | 4             | 1.59 | ± | 0.33 |   | 4             | 1.11 | ± | 0.23 |   |
| Veh                               | 9.5                    | 4             | 0.90 | ± | 0.25 | * | 4             | 0.92 | ± | 0.14 | * |
| Anti-miR-21                       | 4.5                    | 4             | 0.88 | ± | 0.15 |   | 4             | 0.68 | ± | 0.15 |   |
| Anti-miR-21                       | 6.0                    | 3             | 0.56 | ± | 0.05 |   | 4             | 0.74 | ± | 0.15 |   |
| Anti-miR-21                       | 7.5                    | 3             | 0.64 | ± | 0.12 | § | 4             | 0.94 | ± | 0.15 |   |
| Anti-miR-21                       | 9.5                    | 4             | 0.47 | ± | 0.15 |   | 4             | 1.00 | ± | 0.22 | * |
| ACEi                              | 4.5                    | 3             | 0.04 | ± | 0.01 |   | 4             | 0.16 | ± | 0.08 |   |
| ACEi                              | 6.0                    | 3             | 0.04 | ± | 0.02 | # | 3             | 0.60 | ± | 0.41 |   |
| ACEi                              | 7.5                    | 3             | 0.15 | ± | 0.03 | § | 4             | 0.71 | ± | 0.26 |   |
| ACEi                              | 9.5                    | 3             | 0.21 | ± | 0.17 |   | 4             | 0.73 | ± | 0.41 |   |
| ACEi+Anti-miR-21                  | 4.5                    | 4             | 0.11 | ± | 0.07 |   | 3             | 0.38 | ± | 0.24 |   |
| ACEi+Anti-miR-21                  | 6.0                    | 4             | 0.11 | ± | 0.05 | # | 4             | 0.45 | ± | 0.15 |   |
| ACEi+Anti-miR-21                  | 7.5                    | 4             | 0.04 | ± | 0.01 | § | 4             | 0.14 | ± | 0.05 | § |
| ACEi+Anti-miR-21                  | 9.5                    | 4             | 0.16 | ± | 0.03 |   | 4             | 0.52 | ± | 0.15 |   |

\* P<0.05 vs. WT 9.5w, # P<0.05 vs. Veh 6.0w, § P<0.05 vs. Veh 7.5w

Table S3: BUN in 129/SvJ *Col4a3*<sup>-/-</sup> mice in mg/dl

| Group            | Age of animals (weeks) | No of animals | Mean  | ± | SEM   | P   |
|------------------|------------------------|---------------|-------|---|-------|-----|
| Veh              | 7.5                    | 8             | 73.4  | ± | 9.2   |     |
| Veh              | 9.5                    | 7             | 460.1 | ± | 60.8  |     |
| Anti-miR-21      | 7.5                    | 8             | 72.7  | ± | 9.5   |     |
| Anti-miR-21      | 9.5                    | 5             | 304.0 | ± | 106.0 | *   |
| ACEi             | 7.5                    | 4             | 42.5  | ± | 3.4   |     |
| ACEi             | 9.5                    | 2             | 45.6  | ± | 5.7   | * # |
| ACEi+Anti-miR-21 | 7.5                    | 4             | 42.0  | ± | 5.4   |     |
| ACEi+Anti-miR-21 | 9.5                    | 3             | 60.6  | ± | 3.6   | * # |

\* P<0.05 vs. Veh 9.5w, # P<0.05 vs. Anti-miR-21 9.5w

Table S4: Kidney Pathology in 129/SvJ *Col4a3*<sup>-/-</sup> mice

| Laminin Staining |                        |              |      |   |     |                          |              |      |   |     | Fibronectin Staining |              |      |   |     |                          |              |      |   |     |     |
|------------------|------------------------|--------------|------|---|-----|--------------------------|--------------|------|---|-----|----------------------|--------------|------|---|-----|--------------------------|--------------|------|---|-----|-----|
| Glomerular score |                        |              |      |   |     | Tubulointerstitial score |              |      |   |     | Glomerular score     |              |      |   |     | Tubulointerstitial score |              |      |   |     |     |
| Group            | Age of animals (weeks) | No of values | Mean | ± | SEM | P                        | No of values | Mean | ± | SEM | P                    | No of values | Mean | ± | SEM | P                        | No of values | Mean | ± | SEM | P   |
| WT               |                        | 84           | 0.5  | ± | 0.1 |                          | 75           | 0.6  | ± | 0.1 |                      | 69           | 0.3  | ± | 0.1 |                          | 69           | 0.1  | ± | 0.0 |     |
| Veh              | 7.5                    | 75           | 1.3  | ± | 0.1 |                          | 69           | 1.08 | ± | 0.1 |                      | 63           | 1.2  | ± | 0.1 |                          | 63           | 0.9  | ± | 0.1 |     |
| Veh              | 9.5                    | 68           | 1.9  | ± | 0.1 |                          | 60           | 2.05 | ± | 0.1 |                      | 72           | 2.2  | ± | 0.1 |                          | 72           | 1.5  | ± | 0.1 |     |
| Anti-miR-21      | 7.5                    | 84           | 1.8  | ± | 0.1 | *                        | 87           | 1.4  | ± | 0.1 | *                    | 73           | 1.6  | ± | 0.1 | *                        | 75           | 0.7  | ± | 0.1 |     |
| Anti-miR-21      | 9.5                    | 93           | 2.3  | ± | 0.1 | #                        | 90           | 2.1  | ± | 0.1 |                      | 72           | 1.3  | ± | 0.1 | #                        | 72           | 1.0  | ± | 0.1 | #   |
| ACEi             | 7.5                    | 117          | 1.0  | ± | 0.0 | * §                      | 99           | 0.9  | ± | 0.0 | §                    | 78           | 0.5  | ± | 0.1 | * §                      | 78           | 0.5  | ± | 0.1 | *   |
| ACEi             | 9.5                    | 93           | 1.1  | ± | 0.0 | # §                      | 87           | 1.2  | ± | 0.1 | # §                  | 44           | 0.3  | ± | 0.1 | # §                      | 45           | 0.4  | ± | 0.1 | # § |
| ACEi+Anti-miR-21 | 7.5                    | 90           | 1.2  | ± | 0.1 | § *                      | 69           | 1.1  | ± | 0.1 | §                    | 69           | 0.3  | ± | 0.1 | * §                      | 69           | 0.3  | ± | 0.1 | * § |
| ACEi+Anti-miR-21 | 9.5                    | 99           | 1.1  | ± | 0.0 | # §                      | 72           | 1.2  | ± | 0.1 | # §                  | 72           | 0.5  | ± | 0.1 | # §                      | 72           | 0.5  | ± | 0.1 | # § |

\* P<0.05 vs. Veh 7.5w, # P<0.05 vs. Veh 9.5w, § P<0.05 vs. Anti-miR-21 7.5w, § P<0.05 vs. Anti-miR-21 9.5w, ° P<0.05 vs. ACEi 7.5w

Table S5: Survival in males F1-*Col4a3*<sup>-/-</sup> in weeks

| Group            | No of animals | Mean | ± | SEM | P   |
|------------------|---------------|------|---|-----|-----|
| Veh              | 12            | 16.6 | ± | 0.2 |     |
| Anti-miR-21      | 12            | 22.1 | ± | 0.5 | * § |
| ACEi             | 12            | 18.9 | ± | 0.5 | * # |
| ACEi+Anti-miR-21 | 12            | 24.0 | ± | 0.9 | * § |

\* P<0.05 vs. Veh, # P<0.05 vs. Anti-miR-21, § P<0.05 vs. ACEi

Table S6: BUN in males F1-*Col4a3*<sup>-/-</sup> mice in mg/dl

| Group            | BUN mg/dL (Mean±SEM) |                  |                  |                  |                  |                    |                    |                    |
|------------------|----------------------|------------------|------------------|------------------|------------------|--------------------|--------------------|--------------------|
|                  | 5 weeks              | 7 weeks          | 9 weeks          | 11 weeks         | 13 weeks         | 15 weeks           | 17 weeks           | 19 weeks           |
| Wildtype         | 26.6±0.6<br>n=12     | 23.2±0.9<br>n=12 | 24.4±0.5<br>n=12 | 24.2±0.5<br>n=12 | 23.0±0.5<br>n=12 | 24.1±0.6<br>n=12   | NC                 | NC                 |
| Veh              | 25.9±0.5<br>n=12     | 25.9±1.0<br>n=12 | 35.9±2.6<br>n=12 | 53.9±4.2<br>n=12 | 72.2±5.2<br>n=12 | 135.9±13.8<br>n=11 | NC                 | NC                 |
| p-value          | NS                   | *                | *                | *                | *                | *                  |                    |                    |
| Anti-miR-21      | 25.3±0.3<br>n=12     | 24.2±0.5<br>n=12 | 27.6±1.0<br>n=12 | 30.5±1.1<br>n=12 | 36.3±1.9<br>n=12 | 49.1±3.2<br>n=12   | 78.4±9.1<br>n=12   | 132.3±17.0<br>n=12 |
| p-value          | NS                   | NS               | #                | #                | #                | #                  |                    |                    |
| ACEi+Anti-miR-21 | 26.2±0.5<br>n=12     | 25.1±0.6<br>n=12 | 27.1±0.9<br>n=12 | 29.3±1.4<br>n=12 | 34.6±3.0<br>n=12 | 46.3±5.6<br>n=12   | 71.0±8.5<br>n=11   | 91.0±7.4<br>n=11   |
| p-value          | NS                   | NS               | &                | &                | &                | &                  |                    |                    |
| ACEi             | 27.6±0.7<br>n=12     | 25.2±0.7<br>n=12 | 29.8±1.6<br>n=12 | 38.7±3.2<br>n=12 | 52.3±4.6<br>n=12 | 87.8±11.5<br>n=12  | 159.9±29.9<br>n=10 | 203.4±30.8<br>n=5  |

NC Blood not collected

NS=non significant, \* P<0.05 vs. WT, # p<0.05 vs. Veh,

&p<0.05 vs Veh,

Table S7: BUN in males *F1-Col4a3<sup>-/-</sup>* mice in mg/dl

| Group       | BUN mg/dL (Mean±SEM) |                 |                 |                   |
|-------------|----------------------|-----------------|-----------------|-------------------|
|             | 6 weeks              | 9 weeks         | 12 weeks        | 15 weeks          |
| Wildtype    | 28.1±0.8<br>n=5      | 24.8±0.5<br>n=5 | 25.3±1.3<br>n=5 | 25.5±0.7<br>n=5   |
| Veh         | 26.0±0.5<br>n=7      | 29.6±1.3<br>n=7 | 58.1±7.9<br>n=7 | 121.2±15.6<br>n=7 |
| p-value     | NS                   | NS              | *               | *                 |
| Anti-miR-21 | 25.8±0.8<br>n=7      | 22.8±1.3<br>n=7 | 25.7±0.8<br>n=7 | 33.1±2.5<br>n=7   |
| p-value     | NS                   | &               | &               | *&                |
| ACEi        | 28.0±0.6<br>n=6      | 27.5±0.7<br>n=6 | 36.1±3.4<br>n=6 | 60.9±7.0<br>n=6   |
| p-value     | NS                   | NS              | *               | *&                |

NS=non significant, \* P<0.05 vs.WT, & p<0.05 vs Veh,

Table S8: Relative kidney miR-21 levels normalized to miR-191 in males *F1-Col4a3<sup>-/-</sup>* mice

| Group       | No of animals | Mean | ± | SEM  | P   |
|-------------|---------------|------|---|------|-----|
| WT          | 6             | 1.01 | ± | 0.03 |     |
| Veh         | 6             | 7.73 | ± | 0.28 | *   |
| Anti-miR-21 | 6             | 1.38 | ± | 0.04 | *#  |
| ACEi        | 6             | 3.83 | ± | 0.26 | *#§ |

\* P<0.05 vs. WT, # P<0.05 vs. Veh, § P<0.05 vs. anti-miR-21

Table S9: Kidney pathology scores from males *F1-Col4a3<sup>-/-</sup>* mice

| Group       | No of values | Glomerular pathology |   |     |    | Tubular pathology |   |     |     | Interstitial inflammation |   |     |    | Interstitial fibrosis |   |     |     |
|-------------|--------------|----------------------|---|-----|----|-------------------|---|-----|-----|---------------------------|---|-----|----|-----------------------|---|-----|-----|
|             |              | Mean                 | ± | SEM | P  | Mean              | ± | SEM | P   | Mean                      | ± | SEM | P  | Mean                  | ± | SEM | P   |
| WT          | 5            | 0                    | ± | 0   |    | 0                 | ± | 0   |     | 0                         | ± | 0   |    | 0                     | ± | 0   |     |
| Veh         | 8            | 3.9                  | ± | 0.1 | *  | 3.8               | ± | 0.1 | *   | 3.5                       | ± | 0.2 | *  | 3.3                   | ± | 0.1 | *   |
| Anti-miR-21 | 8            | 2.8                  | ± | 0.1 | *# | 2.3               | ± | 0.1 | *#  | 2.0                       | ± | 0.2 | *# | 2.00                  | ± | 0.1 | *#  |
| ACEi        | 6            | 3.8                  | ± | 0.2 | *§ | 3                 | ± | 0.1 | *#§ | 2.5                       | ± | 0.2 | *# | 2.5                   | ± | 0.2 | *#§ |

\* p<0.05 vs. WT, # p<0.05 vs Veh, § p<0.05 vs. Anti-miR-21

| Group       | No of values | αSMA positive nuclei (%) |   |     |    | Trichrome (surface area mm <sup>2</sup> ) |   |     |    |
|-------------|--------------|--------------------------|---|-----|----|-------------------------------------------|---|-----|----|
|             |              | Mean                     | ± | SEM | P  | Mean                                      | ± | SEM | P  |
| WT          | 5            | 6.4                      | ± | 0.7 |    | 0.5                                       | ± | 0.1 |    |
| Veh         | 8            | 28.5                     | ± | 2.6 | *  | 3.4                                       | ± | 0.4 | *  |
| Anti-miR-21 | 8            | 8.6                      | ± | 0.8 | #  | 1.1                                       | ± | 0.2 | *# |
| ACEi        | 6            | 18.3                     | ± | 1.8 | *§ | 1.4                                       | ± | 0.2 | *# |

\* p<0.05 vs. WT, # p<0.05 vs Veh, § p<0.05 vs. Anti-miR-21

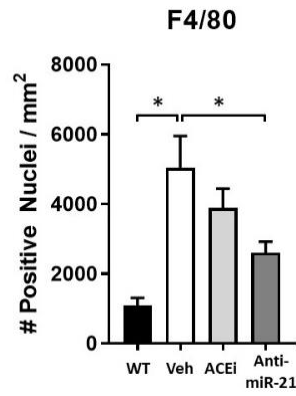

**Figure S1. Analysis of F4/80+ nuclei from WT, Veh, ACEi and Anti-miR-21 kidney sections.** The number of F4/80 positive nuclei per square mm were quantitated in all animals. \*P<0.05 as noted.
